# Supplementary material for: Physically controlled CO 2 effluxes from a reservoir surface in the upper Mekong River Basin: a case study in the Gongguoqiao Reservoir
Source: Copernicus journal article supplement (doi:10.5194/bg-16-2205-2019), 2019-05-29
Supplement: Supplementary file 1 [file bg-16-2205-2019-supplement.pdf]

Supplement of Biogeosciences, 16, 2205–2219, 2019  
<https://doi.org/10.5194/bg-16-2205-2019-supplement>  
© Author(s) 2019. This work is distributed under  
the Creative Commons Attribution 4.0 License.

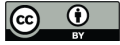

*Supplement of*

**Physically controlled CO<sub>2</sub> effluxes from a reservoir surface  
in the upper Mekong River Basin: a case study  
in the Gongguoqiao Reservoir**

**Lin Lin et al.**

*Correspondence to:* Xixi Lu ([geoluxx@nus.edu.sg](mailto:geoluxx@nus.edu.sg)) and Kaidao Fu ([kdfu@ynu.edu.cn](mailto:kdfu@ynu.edu.cn))

The copyright of individual parts of the supplement might differ from the CC BY 4.0 License.

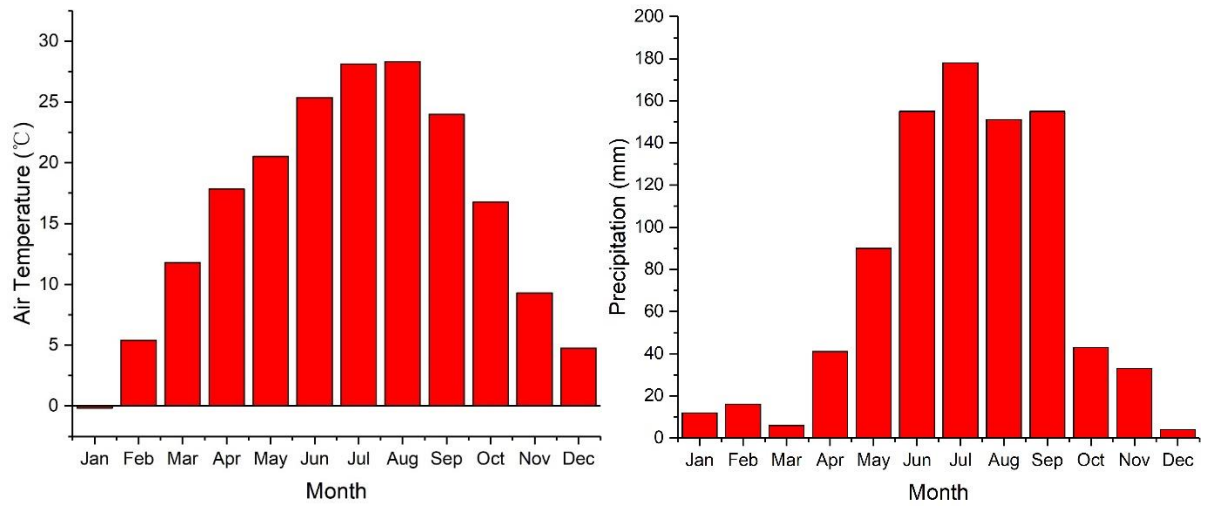

Fig S1 Variation of monthly-average air temperature and of the Gongguo Town (left panel) and variation of monthly-average precipitation of the Dali City in 2016

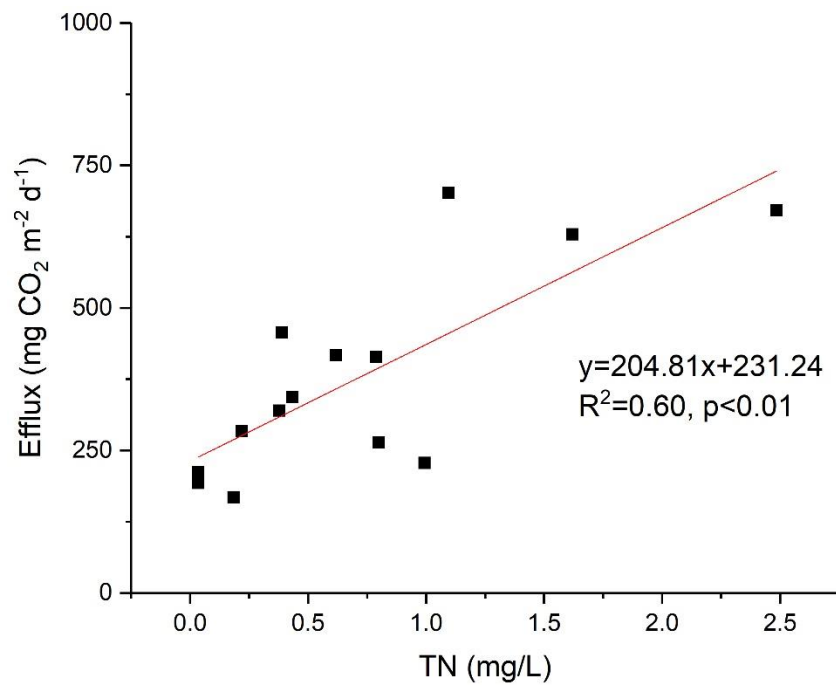

Fig S2 The positive relation between TN concentration and efflux at the littoral zone (Point L)

Table S1 Correlation coefficients among efflux, pCO<sub>2</sub> and water properties

|                  | TN <sup>a</sup>     | TP      | DOC     | DO <sup>b</sup> | Cond     | Temp     | pCO <sub>2</sub> | pH       | Talk    | SPS      | Efflux   |
|------------------|---------------------|---------|---------|-----------------|----------|----------|------------------|----------|---------|----------|----------|
| Chl a            | -0.040 <sup>c</sup> | 0.518** | 0.082   | 0.264*          | -0.233** | 0.058    | 0.042            | -0.027   | 0.236** | 0.467**  | -0.104   |
| TN               |                     | -0.176* | -0.192* | -0.135          | -0.015   | -0.108   | 0.330**          | -0.296** | -0.036  | -0.103   | 0.041    |
| TP               |                     |         | 0.451** | 0.298**         | -0.537** | 0.353**  | -0.018           | 0.017    | 0.095   | 0.819**  | -0.199*  |
| DOC              |                     |         |         | 0.201           | -0.293** | 0.402**  | -0.179*          | 0.101    | -0.086  | 0.488**  | -0.281** |
| DO               |                     |         |         |                 | -0.112   | -0.565** | -0.291*          | 0.264*   | -0.047  | 0.490**  | -0.183   |
| Cond             |                     |         |         |                 |          | -0.442** | 0.151            | 0.126    | 0.356** | -0.607** | 0.188*   |
| Temp             |                     |         |         |                 |          |          | 0.105            | -0.168   | -0.064  | 0.319**  | -0.407** |
| pCO <sub>2</sub> |                     |         |         |                 |          |          |                  | -0.717** | 0.273** | -0.120   | 0.058    |
| pH               |                     |         |         |                 |          |          |                  |          | 0.307** | 0.023    | -0.054   |
| Talk             |                     |         |         |                 |          |          |                  |          |         | 0.021    | 0.098    |
| SPS              |                     |         |         |                 |          |          |                  |          |         |          | -0.257** |

a Totally 127 samples were used for the correlation analysis among TN, TP, DOC, Temp, pH, Talk, SPS and Efflux.

b Totally 77 samples were used for the correlation analysis between DO and other parameters.

c When the correlation is significant at 0.01 level, the coefficient is flagged with double star marks. When the correlation is significant at 0.05 level, the coefficient is flagged with single star mark.
